# Supplementary material for: CAFs-derived exosomes inhibits ferroptosis via GALNT14-mediated O-GalNAcylation of SLC7A11 in colorectal cencer
Source: Research Square preprint supplement (doi:10.21203/rs.3.rs-8266112/v1), 2025-12-10
Supplement: Supplementary file 1 [file 76875ec7216dcf4ebbc53991.pdf]

Supplementary figure

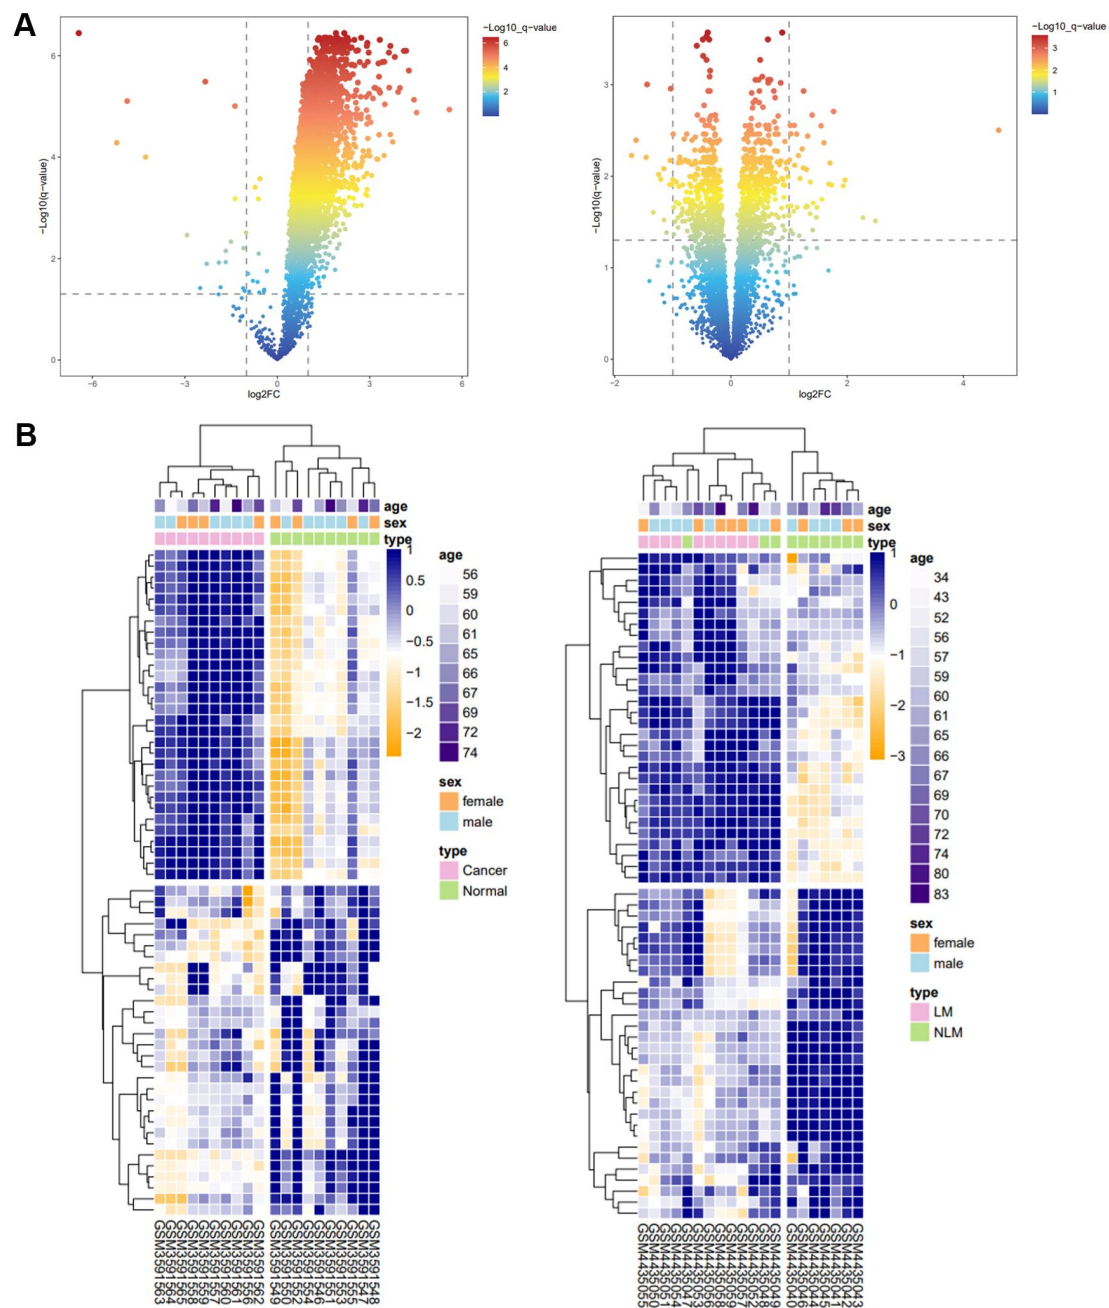

Supplementary Figure 1. CircRNA expression profiles in CRC.

A. A heatmap and volcano plot show the expression of circRNAs in two databases of CRC.

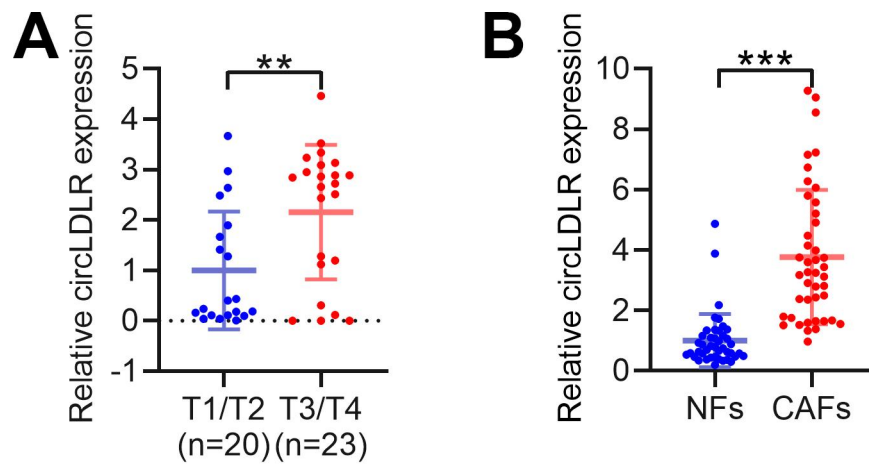

**Supplemental Figure 2. The characteristics of circDLR expression.**

**A.** The relationship between *hsa\_circ\_0003892* expression and clinicopathologic features in CRC patients. **B.** The expression of *hsa\_circ\_0003892* was measured by RT-qPCR in CAFs and NFs from 43 paired CRC tissues. \*\* $P < 0.01$ , \*\*\* $P < 0.001$ . Data are presented as mean  $\pm$  S.D.  $P$  values are calculated by unpaired two-sided  $t$ -test.

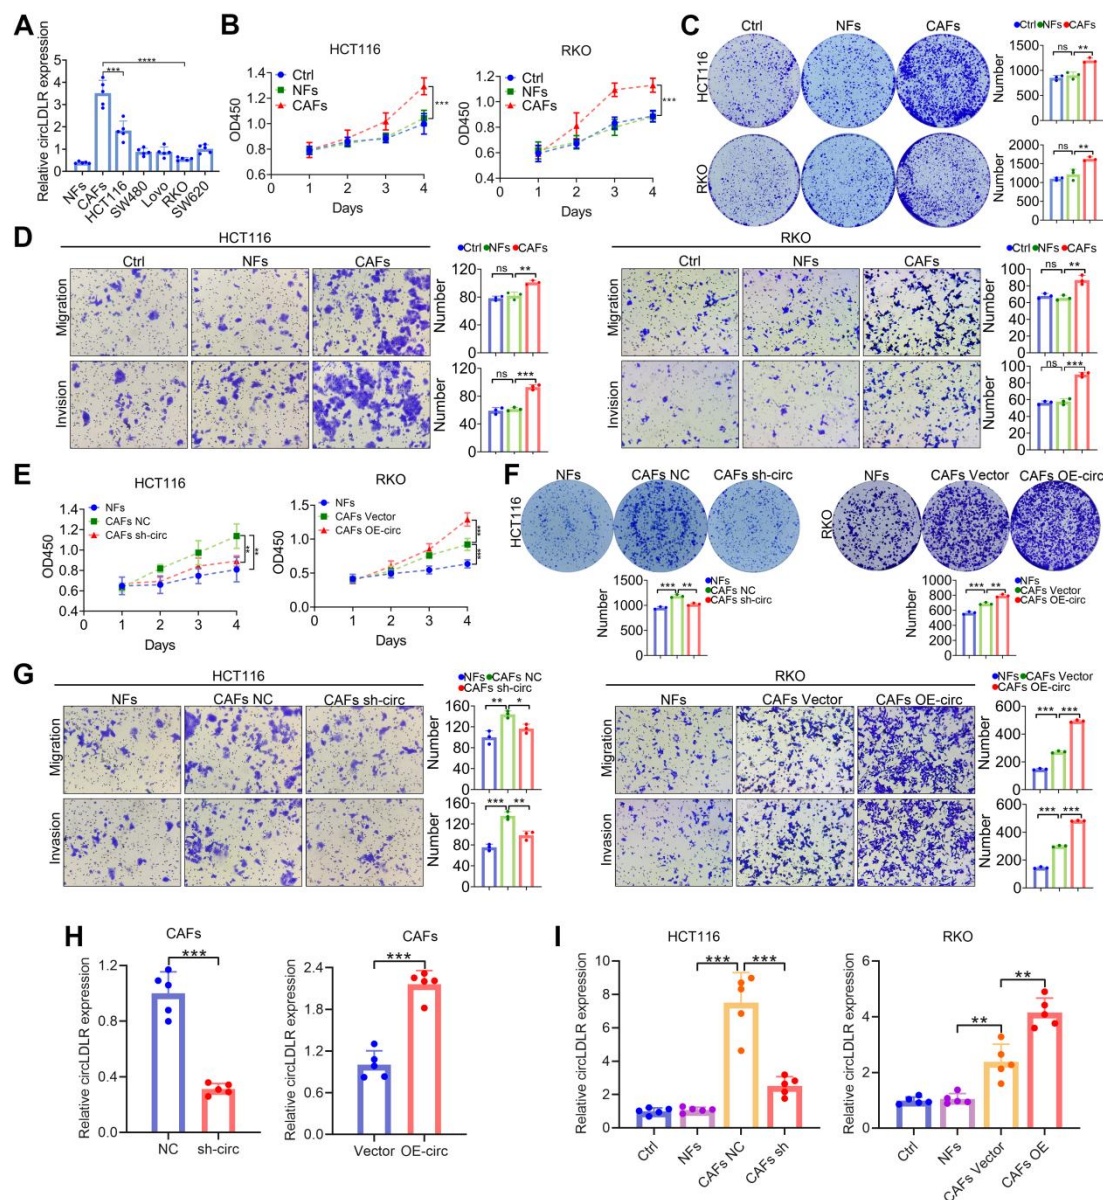

**Supplemental Figure 3. The aberrant expression of circLDLR in CAFs exacerbates CRC progression.**

**A.** The relative expression of circLDLR in CAFs, NFs and CRC cells. **B-D.** CCK8, colony formation and transwell were used to evaluate the viability of HCT 116 and RKO cells co-cultured with CAFs and NFs. **E-G.** CCK8, colony formation, and transwell were carried out to detect the growth and invasion of CRC cells co-cultured with indicated CAFs. **H.** The relative expression of circLDLR in CAFs was detected by qRT-PCR. **I.** The relative expression of circLDLR in co-cultured CRC cells was detected by qRT-PCR. \*\* $P < 0.01$ , \*\*\* $P < 0.001$ , \*\*\*\* $P < 0.0001$ . In **A**,  $n = 5$  biologically independent experiments. In **B-G**,  $n = 3$  biologically independent experiments. Data are presented as mean  $\pm$  S.D.  $P$  values are calculated by unpaired two-sided  $t$ -test.

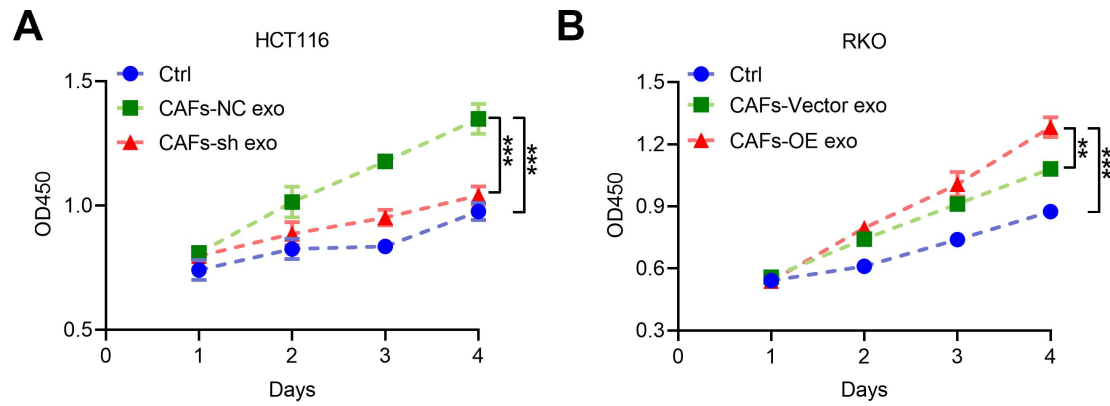

**Supplemental Figure 4. The proliferation ability of CRC cells.**

**A.** The proliferation ability of HCT116. **B.** The proliferation ability of RKO.  $**P<0.01$ ,  $***P<0.001$ .  $n=3$  biologically independent experiments. Data are presented as mean  $\pm$  S.D.  $P$  values are calculated by unpaired two-sided  $t$ -test.

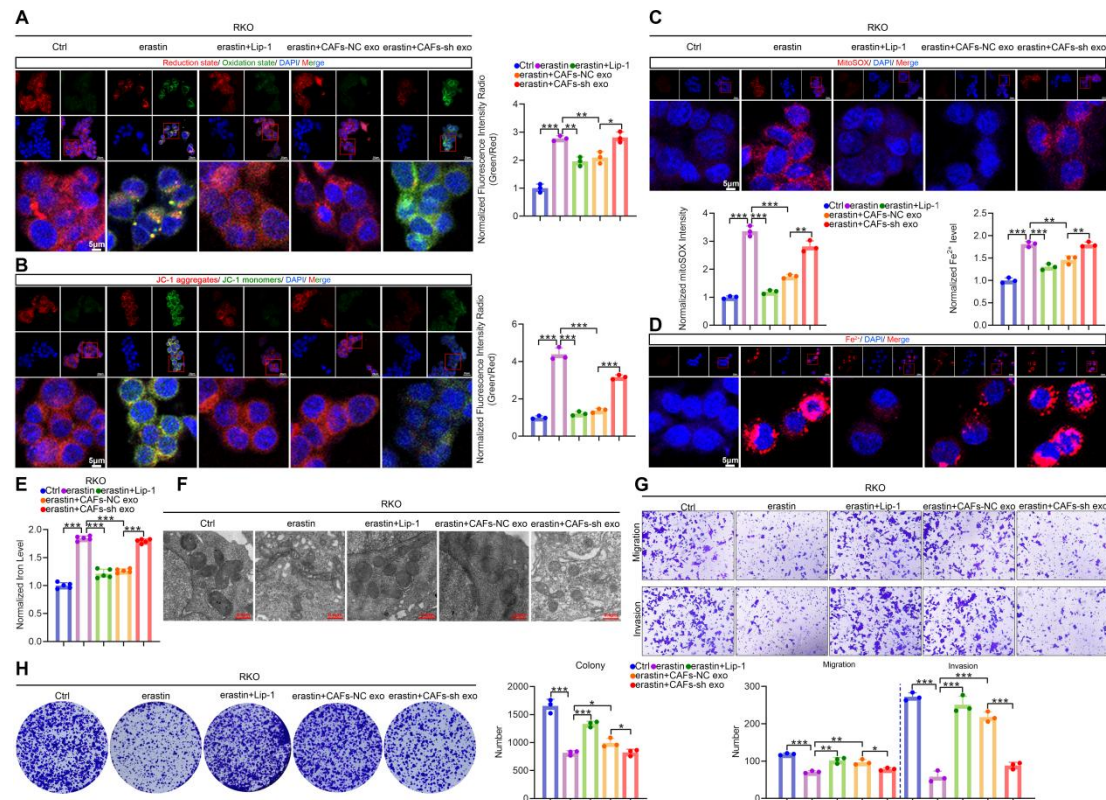

**Supplemental Figure 5. CAFs-derived circLDLR facilitates the progression of CRC cells by inhibiting cancer ferroptosis.**

**A.** Lipid peroxidation level in RKO. Scale bar, 5  $\mu$ m. **B, C.** Relative levels of MMP and MitoSOX. Scale bar, 5  $\mu$ m. **D, E.** Relative Fe<sup>2+</sup> and Iron levels. Scale bar, 5  $\mu$ m. **F.** TEM images of mitochondria. Scale bar, 0.4  $\mu$ m. **G, H.** Invasion, migration and colony formation assays.  $*P<0.05$ ,  $**P<0.01$ ,  $***P<0.001$ . In E,  $n=5$  biologically independent experiments. In A-D, G and H,  $n=3$  biologically independent experiments. Data are presented as mean  $\pm$  S.D.  $P$  values are calculated by unpaired two-sided  $t$ -test.



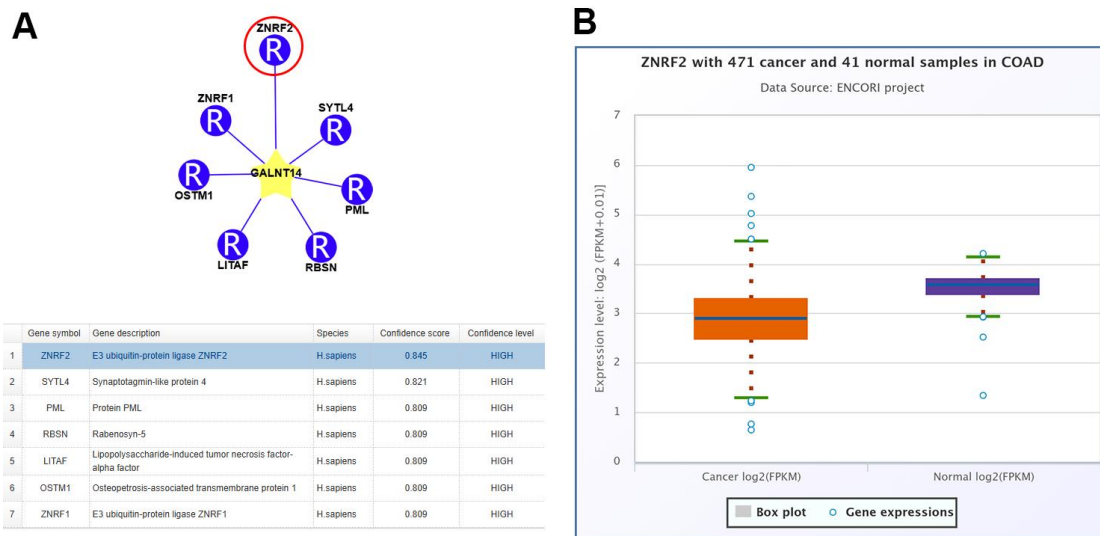

**Supplemental Figure 6. The prediction of E3 ubiquitin ligase in GALNT14.**

**A.** The prediction of E3 ubiquitin ligase. **B.** The expression of ZNRF2 in cancer and normal samples.

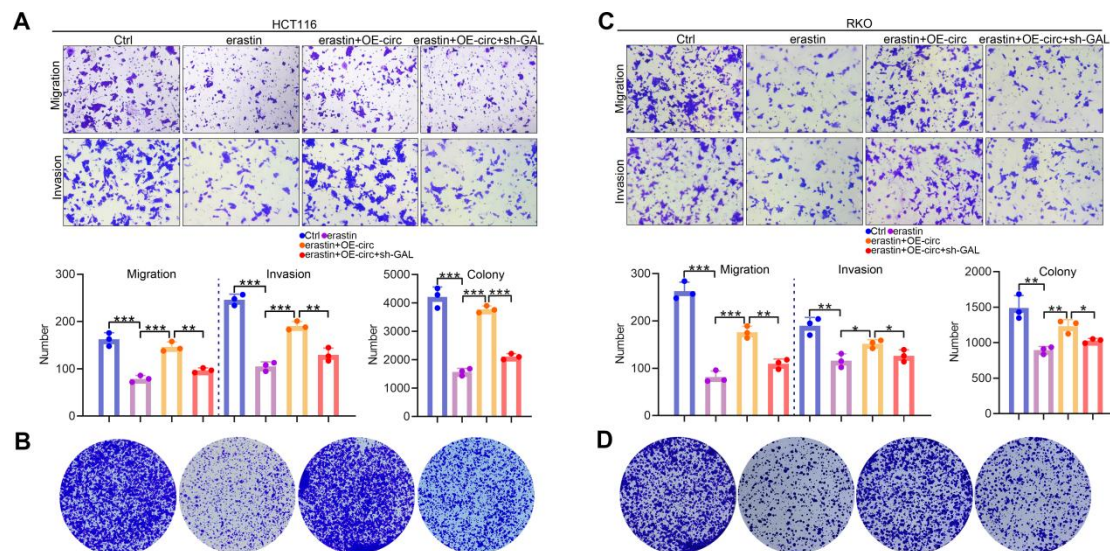

**Supplemental Figure 7. The migration, invasion and colony abilities of CRC cells were influenced by circLDLR and GALNT14.**

**A.** Transwell assays of HCT116. **B.** Colony formation of HCT116. **C.** Transwell assays of RKO. **D.** Colony formation of RKO.  $n=3$  biologically independent experiments. Data are presented as mean  $\pm$  S.D.  $P$  values are calculated by unpaired two-sided  $t$ -test.

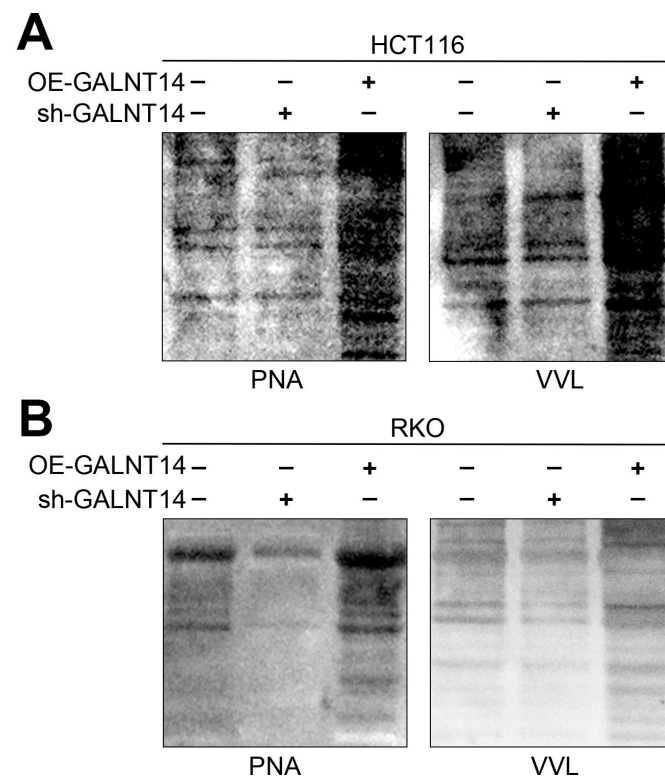

**Supplemental Figure 8. GALNT14 enhances total protein O-GalNAcylation in CRC cells.**

**A, B.** Western blot analysis of total protein O-GalNAcylation with GALNT14 overexpression or deletion in CRC cells.

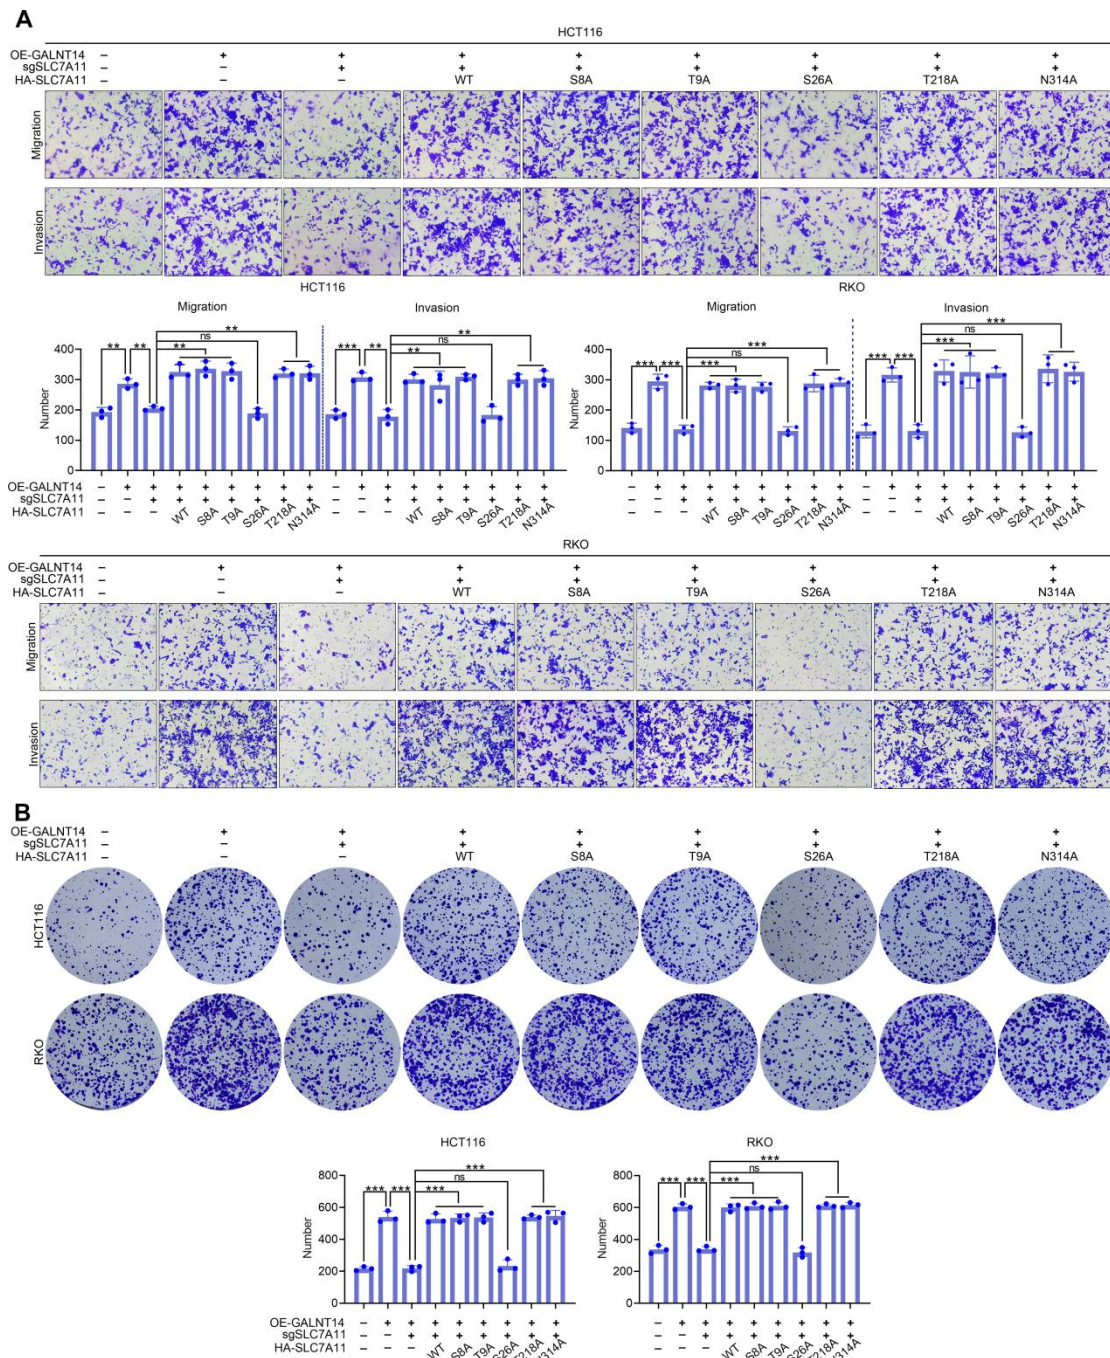

**Supplemental Figure 9. The proliferation, migration and invasion abilities of CRC cells.**

**A.** Transwell was used to evaluate the viability of CRC cells. **B.** Colony formation was used to evaluate the viability of CRC cells.



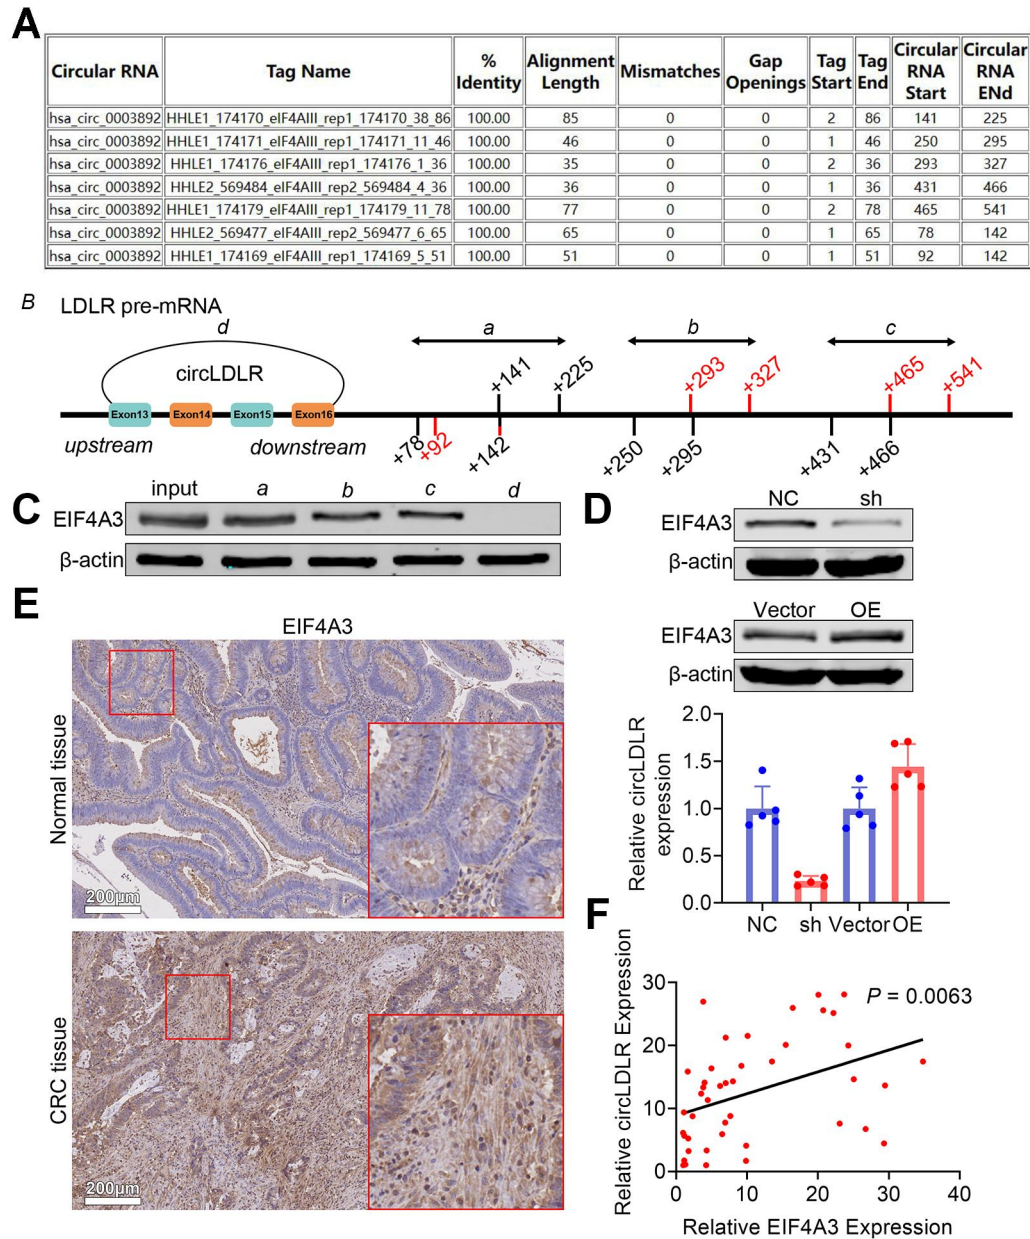

### Supplemental Figure 10. Biogenesis of circLDLR is facilitated by EIF4A3.

**A.** Prediction of the putative EIF4A3 binding sites in circLDLR pre-mRNA by CircInteractome database. **B.** Five positions (a-d) in circLDLR pre-mRNA. **C.** Western blot analysis of EIF4A3 protein with RNA pulldown assay. **D.** The levels of circLDLR in CAFs transfected with sh-NC, sh-EIF4A3, OE-Vector, OE-EIF4A3. n=5 biologically independent experiments. **E.** Representative images of IHC staining in CRC tissue and adjacent normal tissue. Scale bar, 200 μm. **F.** The relationship between EIF4A3 and circLDLR in CRC tissues (n=43). \* $P < 0.05$ , \*\*\* $P < 0.001$ . Data are presented as mean  $\pm$  S.D.  $P$  values are calculated by unpaired two-sided  $t$ -test.
